# Supplementary material for: Greenhouse Gas Emission Offsets of Forest Residues for Bioenergy in Queensland, Australia
Source: MDPI journal article supplement (doi:10.3390/f12111570), 2021-11-15
Supplement: s1 [file s1]

Name  Auto Name

Type  Notes  Usage...

Timing ☒ Simulate   Days  Add Days

Thin

Affected Portion  Percentage of forest affected by thin ☐ Enable biomass based age adjustment

Age Adjustment

Destination Percentages in the Affected Portion ☐ Log grades ☐ Manual

Stems to:

|                                    |                    |
|------------------------------------|--------------------|
| <input type="text" value="0"/>     | Standing dead stem |
| <input type="text" value="0"/>     | Deadwood           |
| <input type="text" value="0"/>     | Biofuel            |
| <input type="text" value="0"/>     | Paper and pulp     |
| <input type="text" value="5"/>     | Packing wood       |
| <input type="text" value="0"/>     | Furniture          |
| <input type="text" value="0"/>     | Fiberboard         |
| <input type="text" value="95"/>    | Construction       |
| <input type="text" value="0"/>     | Mill residue       |
| <input type="text" value="100.0"/> |                    |

Branches to:

|                                    |                      |
|------------------------------------|----------------------|
| <input type="text" value="0"/>     | Standing dead branch |
| <input type="text" value="5"/>     | Deadwood             |
| <input type="text" value="0"/>     | Biofuel              |
| <input type="text" value="0"/>     | Paper and pulp       |
| <input type="text" value="0"/>     | Packing wood         |
| <input type="text" value="95"/>    | Furniture            |
| <input type="text" value="0"/>     | Fiberboard           |
| <input type="text" value="0"/>     | Construction         |
| <input type="text" value="0"/>     | Mill residue         |
| <input type="text" value="100.0"/> |                      |

Bark to:

|                                    |                    |
|------------------------------------|--------------------|
| <input type="text" value="0"/>     | Standing dead bark |
| <input type="text" value="5"/>     | Bark litter        |
| <input type="text" value="0"/>     | Biofuel            |
| <input type="text" value="95"/>    | Paper              |
| <input type="text" value="0"/>     | Mill residue       |
| <input type="text" value="100.0"/> |                    |

Leaves to:

|                                    |                    |
|------------------------------------|--------------------|
| <input type="text" value="0"/>     | Standing dead leaf |
| <input type="text" value="100"/>   | Leaf litter        |
| <input type="text" value="0"/>     | Biofuel            |
| <input type="text" value="100.0"/> |                    |

Standing dead stem to:

|                                |         |
|--------------------------------|---------|
| <input type="text" value="0"/> | Biofuel |

Deadwood to:

|                                |         |
|--------------------------------|---------|
| <input type="text" value="0"/> | Biofuel |

Chopped wood to:

|                                |         |
|--------------------------------|---------|
| <input type="text" value="0"/> | Biofuel |

Bark Litter to:

|                                |         |
|--------------------------------|---------|
| <input type="text" value="0"/> | Biofuel |

Leaf Litter to:

|                                |         |
|--------------------------------|---------|
| <input type="text" value="0"/> | Biofuel |

Post-Thin Period

Relative Allocation Multipliers

|                                |              |
|--------------------------------|--------------|
| <input type="text" value="1"/> | Stems        |
| <input type="text" value="1"/> | Branches     |
| <input type="text" value="1"/> | Bark         |
| <input type="text" value="1"/> | Leaves       |
| <input type="text" value="1"/> | Coarse roots |
| <input type="text" value="1"/> | Fine roots   |

Length of Period

|                                |            |
|--------------------------------|------------|
| <input type="text" value="0"/> | Years [yr] |
|--------------------------------|------------|

Tree Removal and Replacement

Trees (stems) removed by this thin: 40.0%

Average age of removed trees =  X Average age of trees

+  X Age of the oldest trees

+  [yr]

☐ Replace removed trees with new trees (of age 0)

Name  Auto Name

Type  Notes  Usage...

Timing ☒ Simulate   Days  Add Days

Thin

Affected Portion  Percentage of forest affected by thin ☐ Enable biomass based age adjustment

Age Adjustment

Destination Percentages in the Affected Portion ☐ Log grades ☐ Manual

Stems to:

|                                    |                    |
|------------------------------------|--------------------|
| <input type="text" value="0"/>     | Standing dead stem |
| <input type="text" value="0"/>     | Deadwood           |
| <input type="text" value="0"/>     | Biofuel            |
| <input type="text" value="0"/>     | Paper and pulp     |
| <input type="text" value="5"/>     | Packing wood       |
| <input type="text" value="0"/>     | Furniture          |
| <input type="text" value="0"/>     | Fiberboard         |
| <input type="text" value="95"/>    | Construction       |
| <input type="text" value="0"/>     | Mill residue       |
| <input type="text" value="100.0"/> |                    |

Branches to:

|                                    |                      |
|------------------------------------|----------------------|
| <input type="text" value="0"/>     | Standing dead branch |
| <input type="text" value="5"/>     | Deadwood             |
| <input type="text" value="0"/>     | Biofuel              |
| <input type="text" value="0"/>     | Paper and pulp       |
| <input type="text" value="0"/>     | Packing wood         |
| <input type="text" value="95"/>    | Furniture            |
| <input type="text" value="0"/>     | Fiberboard           |
| <input type="text" value="0"/>     | Construction         |
| <input type="text" value="0"/>     | Mill residue         |
| <input type="text" value="100.0"/> |                      |

Bark to:

|                                    |                    |
|------------------------------------|--------------------|
| <input type="text" value="0"/>     | Standing dead bark |
| <input type="text" value="5"/>     | Bark litter        |
| <input type="text" value="0"/>     | Biofuel            |
| <input type="text" value="95"/>    | Paper              |
| <input type="text" value="0"/>     | Mill residue       |
| <input type="text" value="100.0"/> |                    |

Leaves to:

|                                    |                    |
|------------------------------------|--------------------|
| <input type="text" value="0"/>     | Standing dead leaf |
| <input type="text" value="100"/>   | Leaf litter        |
| <input type="text" value="0"/>     | Biofuel            |
| <input type="text" value="100.0"/> |                    |

Standing dead stem to:

|                                |         |
|--------------------------------|---------|
| <input type="text" value="0"/> | Biofuel |

Deadwood to:

|                                |         |
|--------------------------------|---------|
| <input type="text" value="0"/> | Biofuel |

Chopped wood to:

|                                |         |
|--------------------------------|---------|
| <input type="text" value="0"/> | Biofuel |

Bark Litter to:

|                                |         |
|--------------------------------|---------|
| <input type="text" value="0"/> | Biofuel |

Leaf Litter to:

|                                |         |
|--------------------------------|---------|
| <input type="text" value="0"/> | Biofuel |

Post-Thin Period

Relative Allocation Multipliers

|                                |              |
|--------------------------------|--------------|
| <input type="text" value="1"/> | Stems        |
| <input type="text" value="1"/> | Branches     |
| <input type="text" value="1"/> | Bark         |
| <input type="text" value="1"/> | Leaves       |
| <input type="text" value="1"/> | Coarse roots |
| <input type="text" value="1"/> | Fine roots   |

Length of Period

|                                |            |
|--------------------------------|------------|
| <input type="text" value="0"/> | Years [yr] |
|--------------------------------|------------|

Tree Removal and Replacement

Trees (stems) removed by this thin: 100.0%

Average age of removed trees =  X Average age of trees

+  X Age of the oldest trees

+  [yr]

☐ Replace removed trees with new trees (of age 0)

Regime Editing

# regimes in queue 2  
unique 1

Event Editing

☐ Sort by system  
☐ Only show simulating events  
☐ Sort by whether simulating

Status  
Ready

Initial conditions  
No trees.

# events in queue 18  
Simulating 12  
Non-simulating 6

| Date        | Name                                        | Notes |
|-------------|---------------------------------------------|-------|
| 29 Jun 1984 | Site prep: Windrow and burn                 |       |
| 29 Jul 1984 | Plant trees: Pinus hybrids                  |       |
| 29 Jul 1984 | Starter fertiliser - normal                 |       |
| 29 Jul 1984 | Weed control - Standard (All, 1980-present) |       |
| 30 Jul 2001 | Thin 1 PI (Qld, 1985-present)               |       |
| 30 Jul 2019 | Thin clearing (Qld, 1968-present)           |       |
| 29 Jun 2020 | Site prep: Windrow and burn                 |       |
| 29 Jul 2020 | Plant trees: Pinus hybrids                  |       |
| 29 Jul 2020 | Starter fertiliser - normal                 |       |
| 29 Jul 2020 | Weed control - Standard (All, 1980-present) |       |
| 30 Jul 2036 | Thin 1 PI (Qld, 1985-present)               |       |
| 30 Jul 2050 | Thin clearing (Qld, 1968-present)           |       |
